# Supplementary material
Source: publisher site journal article supplement (https://www.dovepress.com/article/459077)
Supplement: Supplementary file 1 [file get_supplementary_file.php]

**Supplementary Material**

**Supplementary Methods**

1. **Extraction of primary mouse islets**

The 1 mg/mL Collagenase V (C9263, Sigma-Aldrich) was injected into the pancreas using a fine syringe needle, recirculating the enzymatic fluid 2-3 times. The extracted pancreas was then placed in a digestion flask and incubated at 37°C for 15 minutes. Removed from the water bath, the sample was agitated 12 times before adding ice-cold Hanks solution (enriched with calcium and magnesium) to halt digestion. This was repeated three times, placing the sample on ice after each step. Finally, purified islets were manually selected under a stereoscopic microscope**.**

1. **Molecular docking of protein to protein**

The protein structures of HRAS, PI3K and RAF were all derived from the RCSB database (https://www.rcsb.org/, PDB ID: 8TBG, 7RSP, 9AY7). All protein structures were treated in a molecular operating environment (MOE 2019.1) platform with a site selection of Amber10, including removal of water and ions, protonation, addition of missing atoms and completion of missing groups, and minimization of protein energy. Using HDOCK software, each protein was set as rigid, the docking contact site was set as full surface, and the conformation generated after docking was set as 100. The docking score was calculated based on the knowledge iterative scoring function ITScorePP. A more negative docking score means a more likely bonding model. At last, Pymol2.1 software is used for visualization analysis.

**Supplementary Figures**


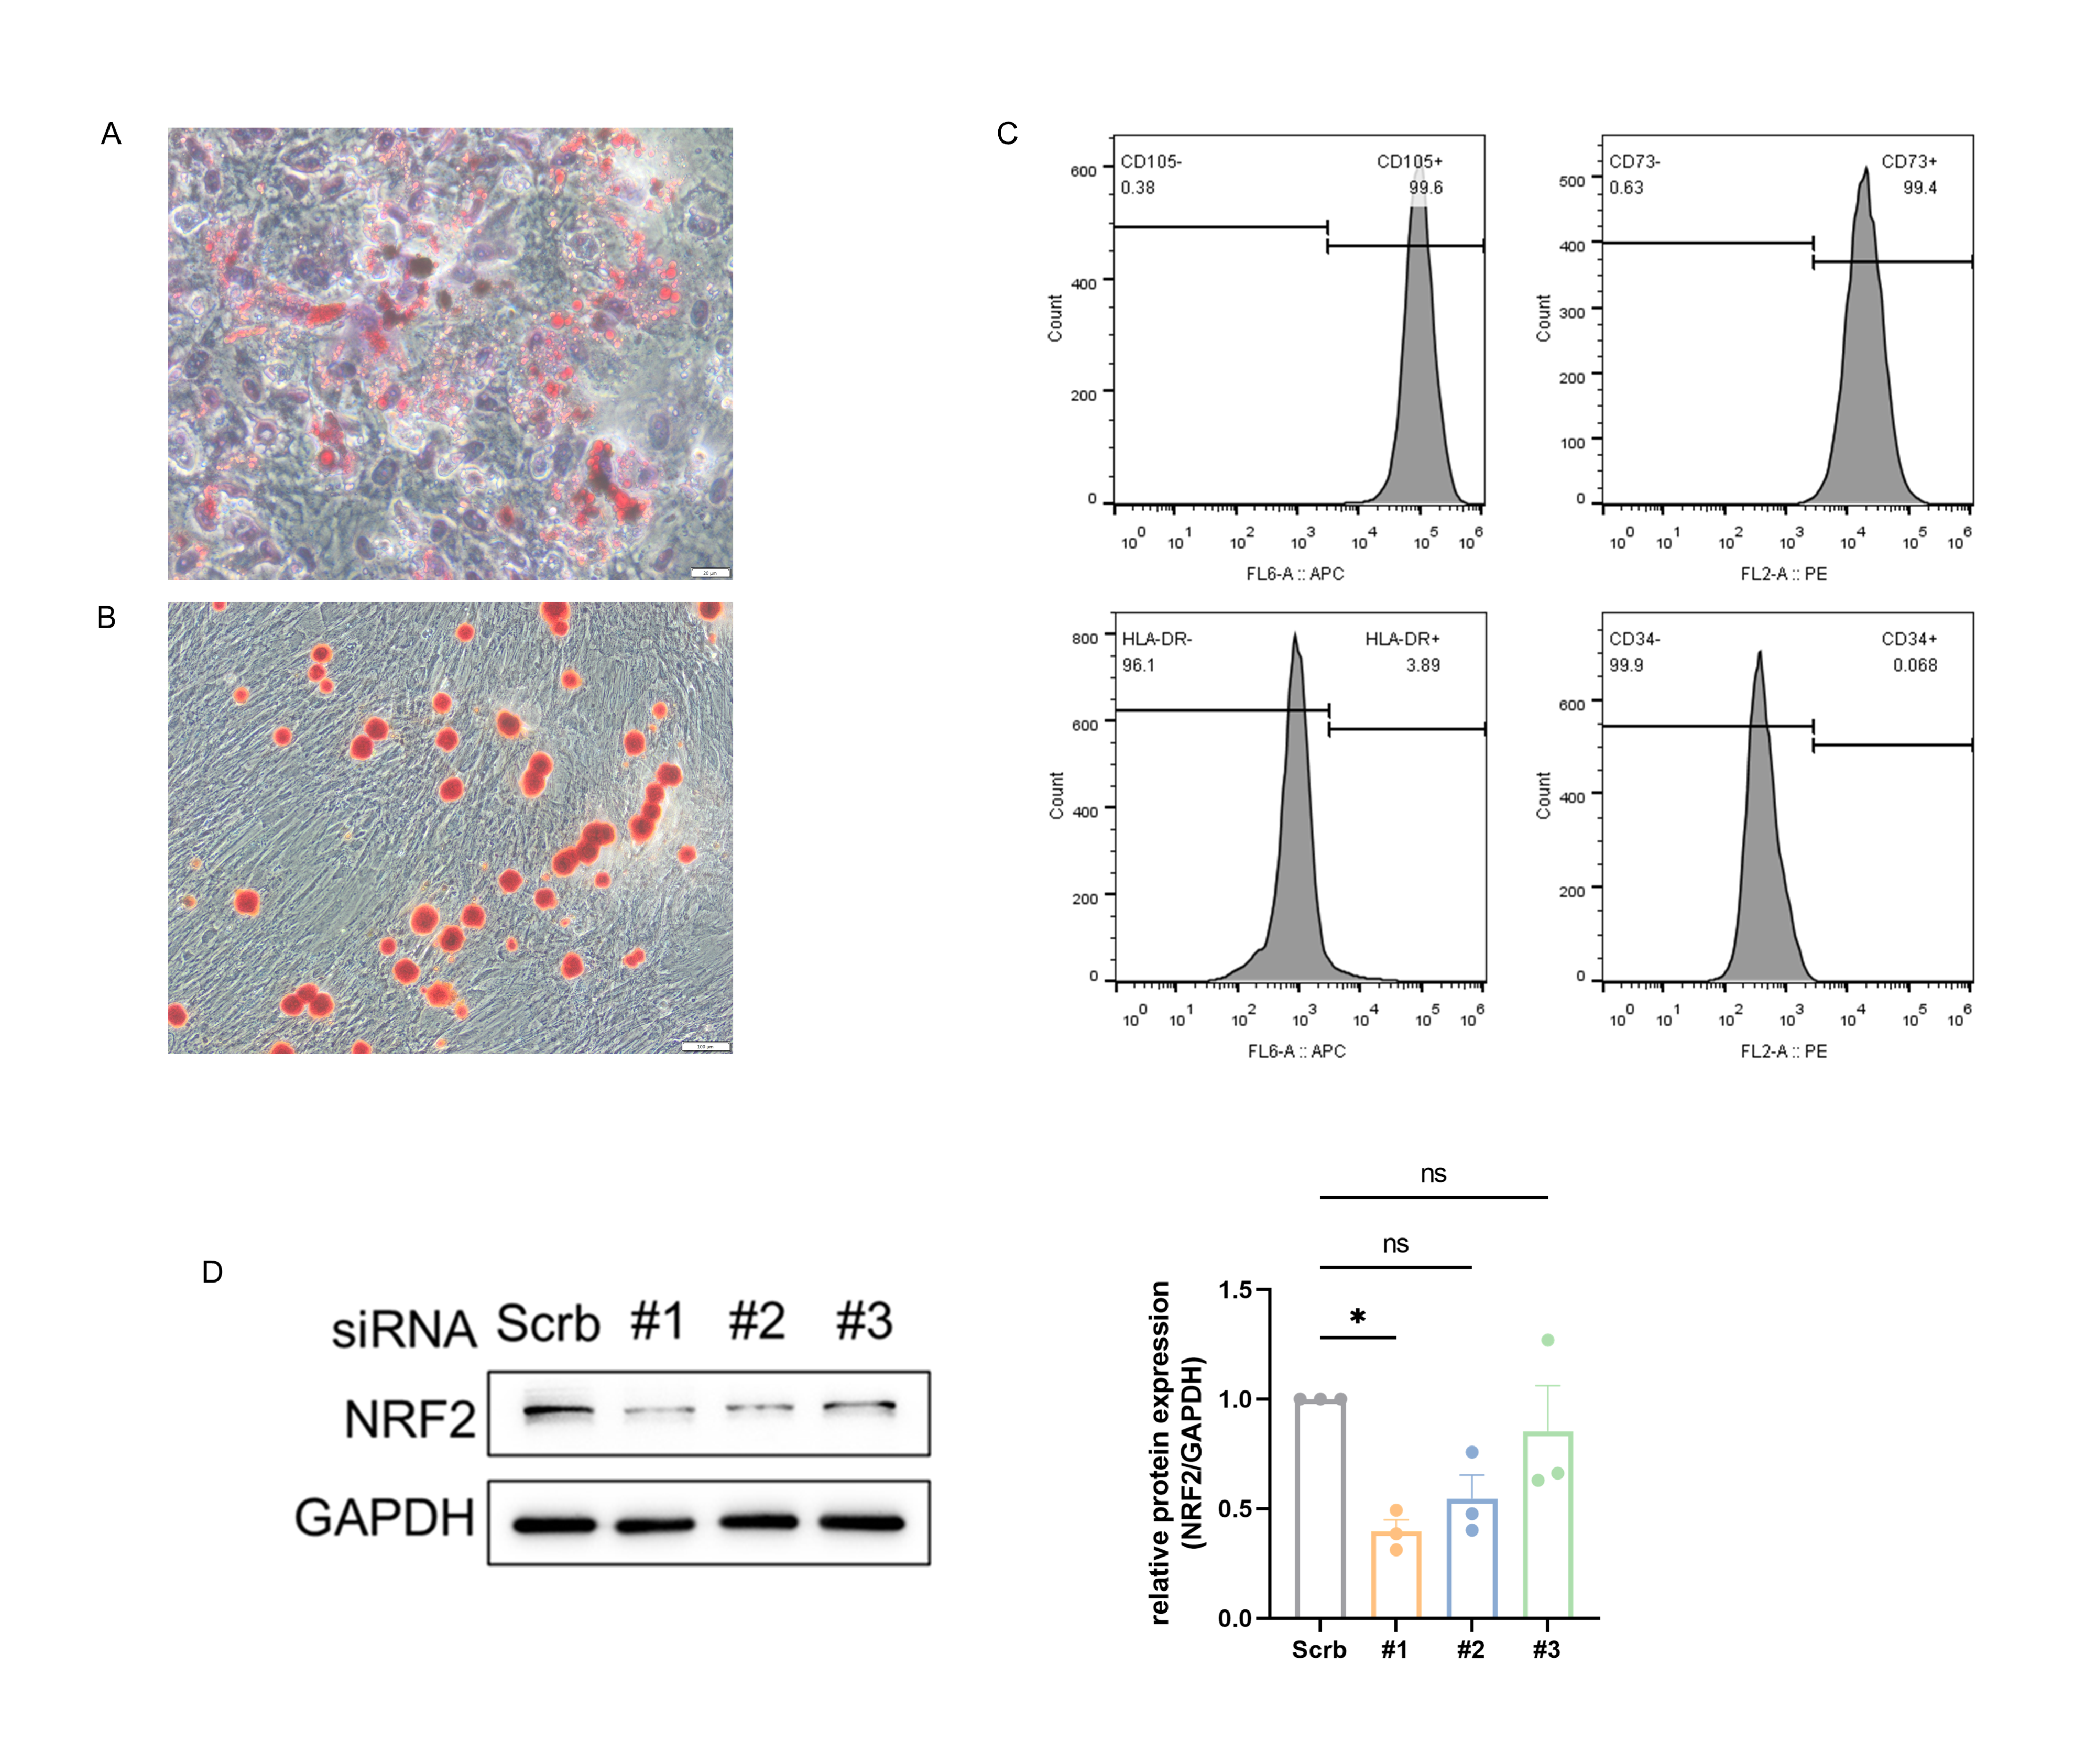


**Figure S1.** Oil Red O staining (Scale bar, 20 μm) (A)and Alizarin Red staining (Scale bar, 100 μm) (B) were used to detect the adipogenic and osteogenic differentiation ability of hucMSCs, respectively. (C) CD105, CD73, CD34, and HLA-DR markers of hucMSCs were analyzed by flow cytometry. (D) Western blot analysis of the knockdown efficiency of NRF2.(*P < 0.05).

**Figure S2.** (A) Quantitative determination of ferrous iron concentrations in INS-1 cells (n = 4). (B) Quantitative determination of GSH concentrations in INS-1 cells (n = 3).
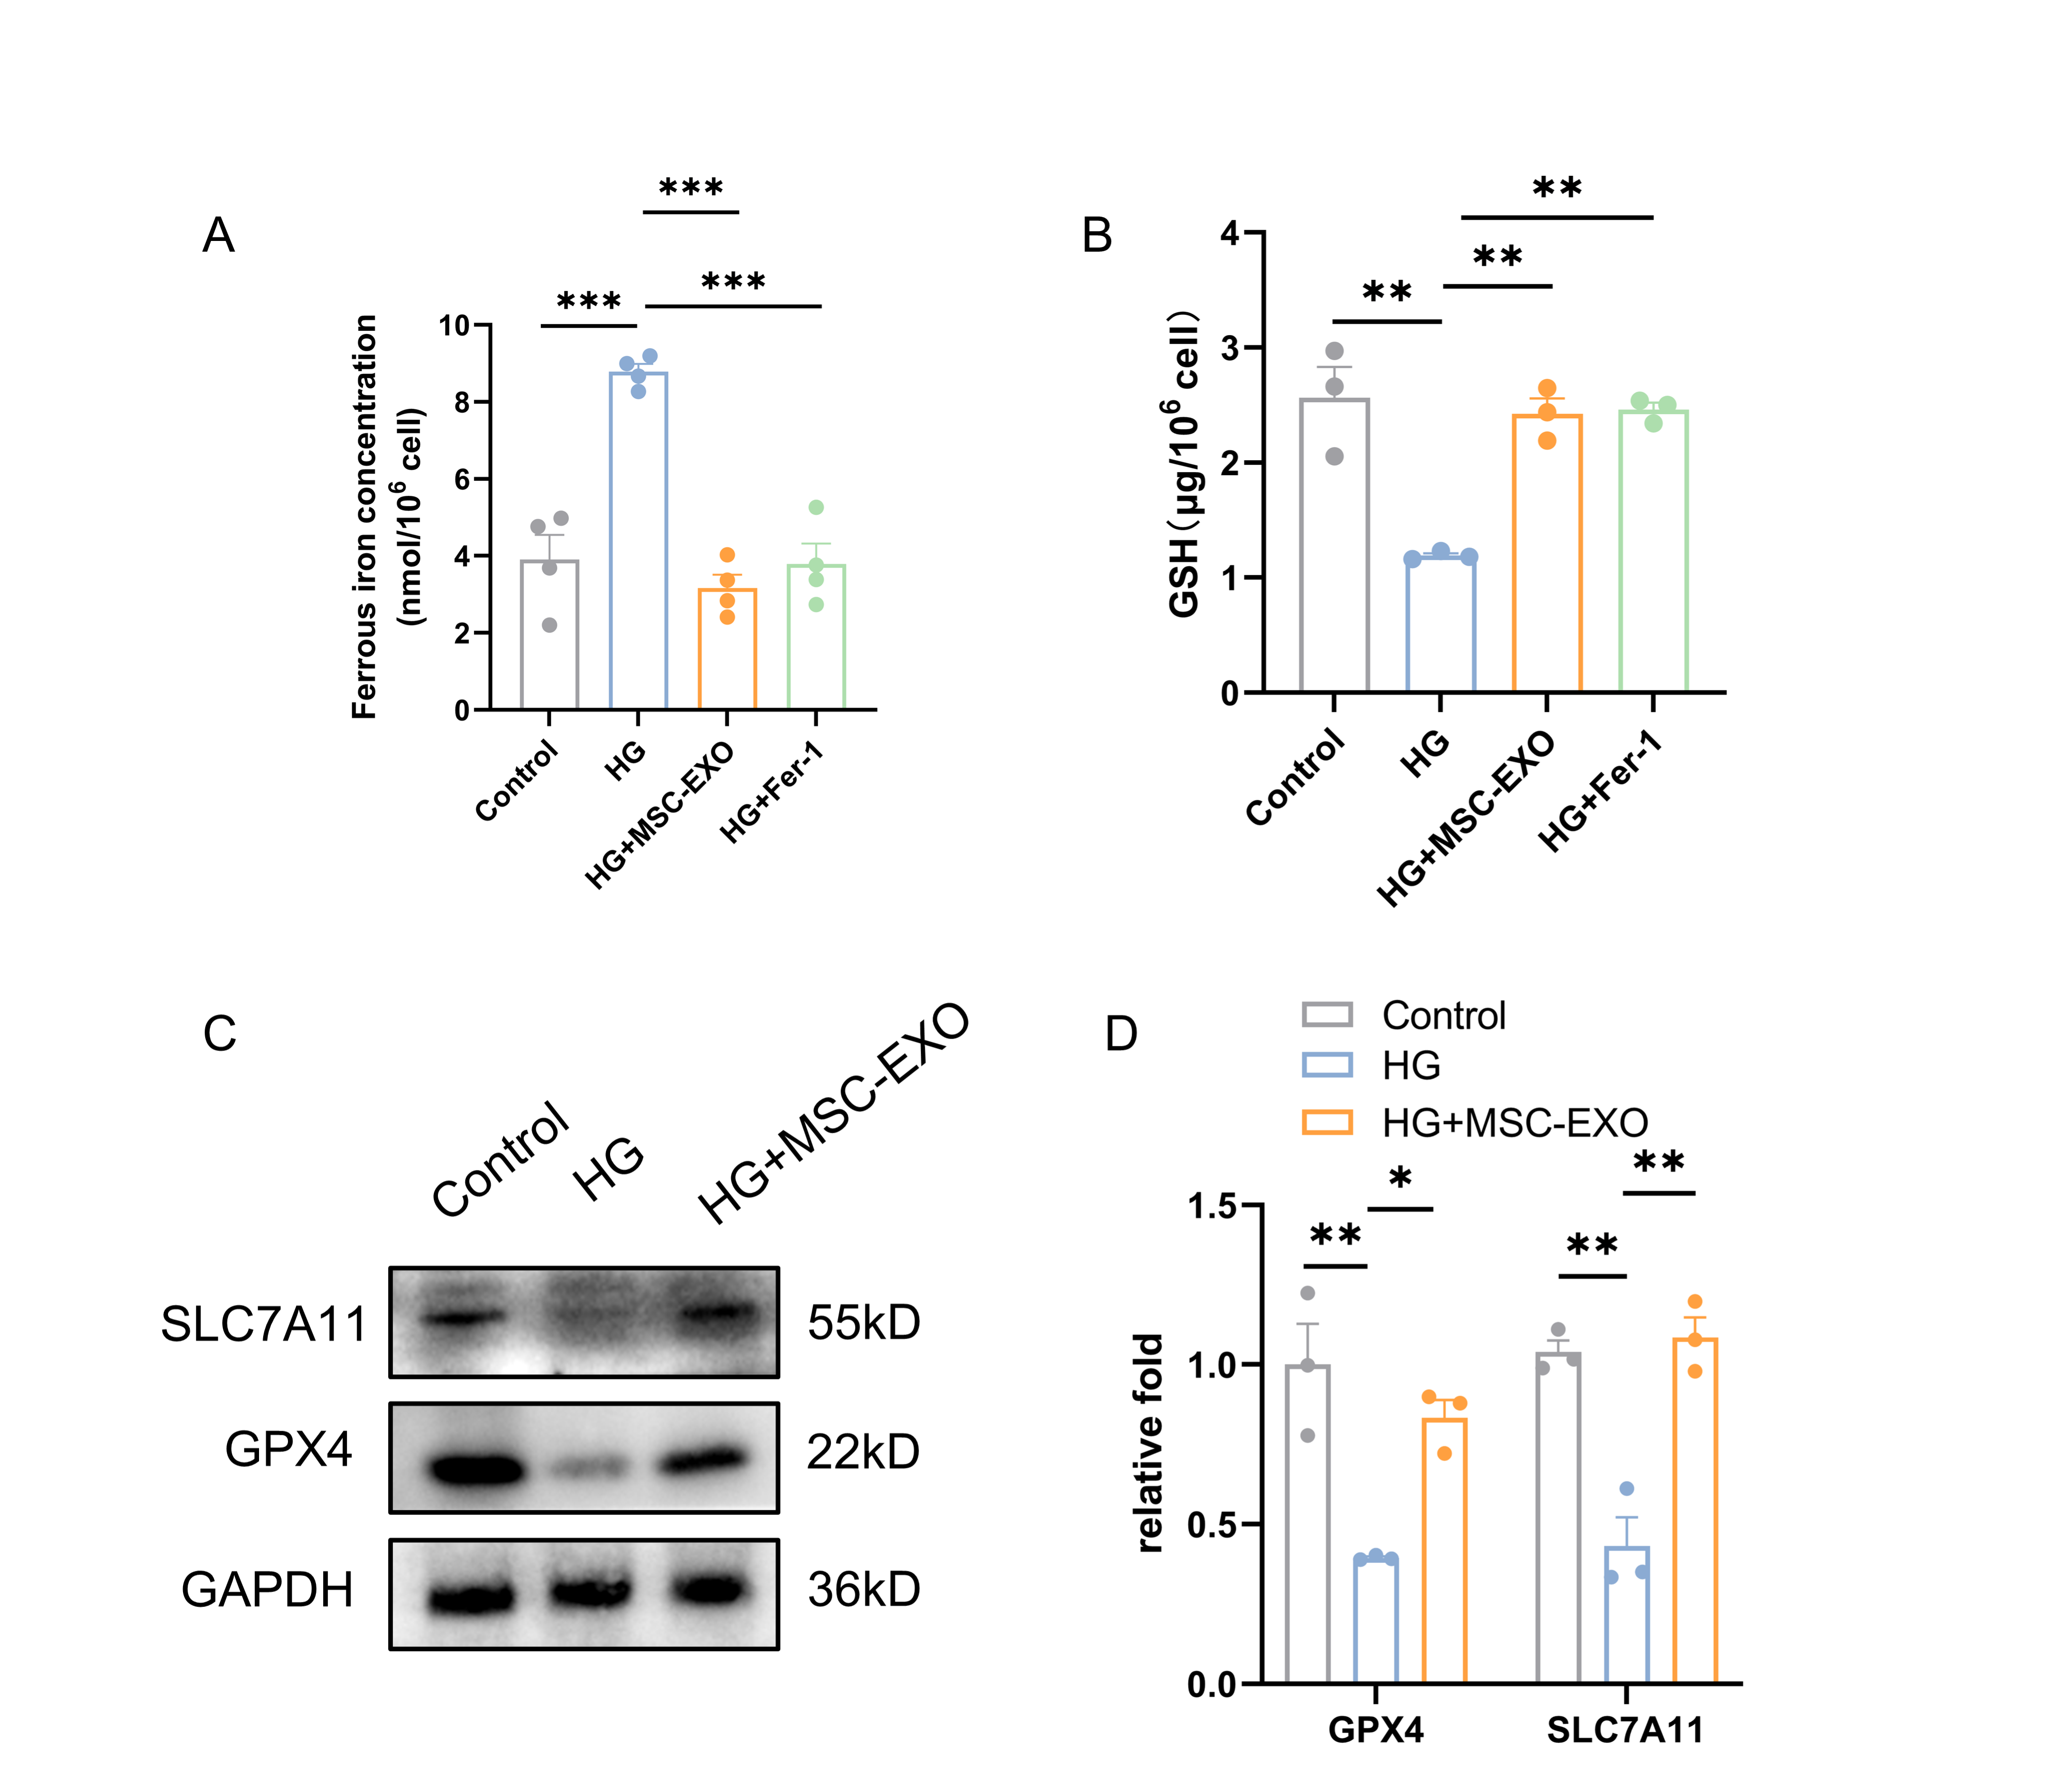
 Western blot images (C) and analysis (D) of GPX4, SLC7A11, and GAPDH in mouse primary pancreatic islets treated with MSC-EXO and HG (n = 3). (*P < 0.05, **P < 0.01, ***P < 0.001).

**Figure S3.** Molecular docking model diagram of HRAS with PI3K (A) and RAF (B).
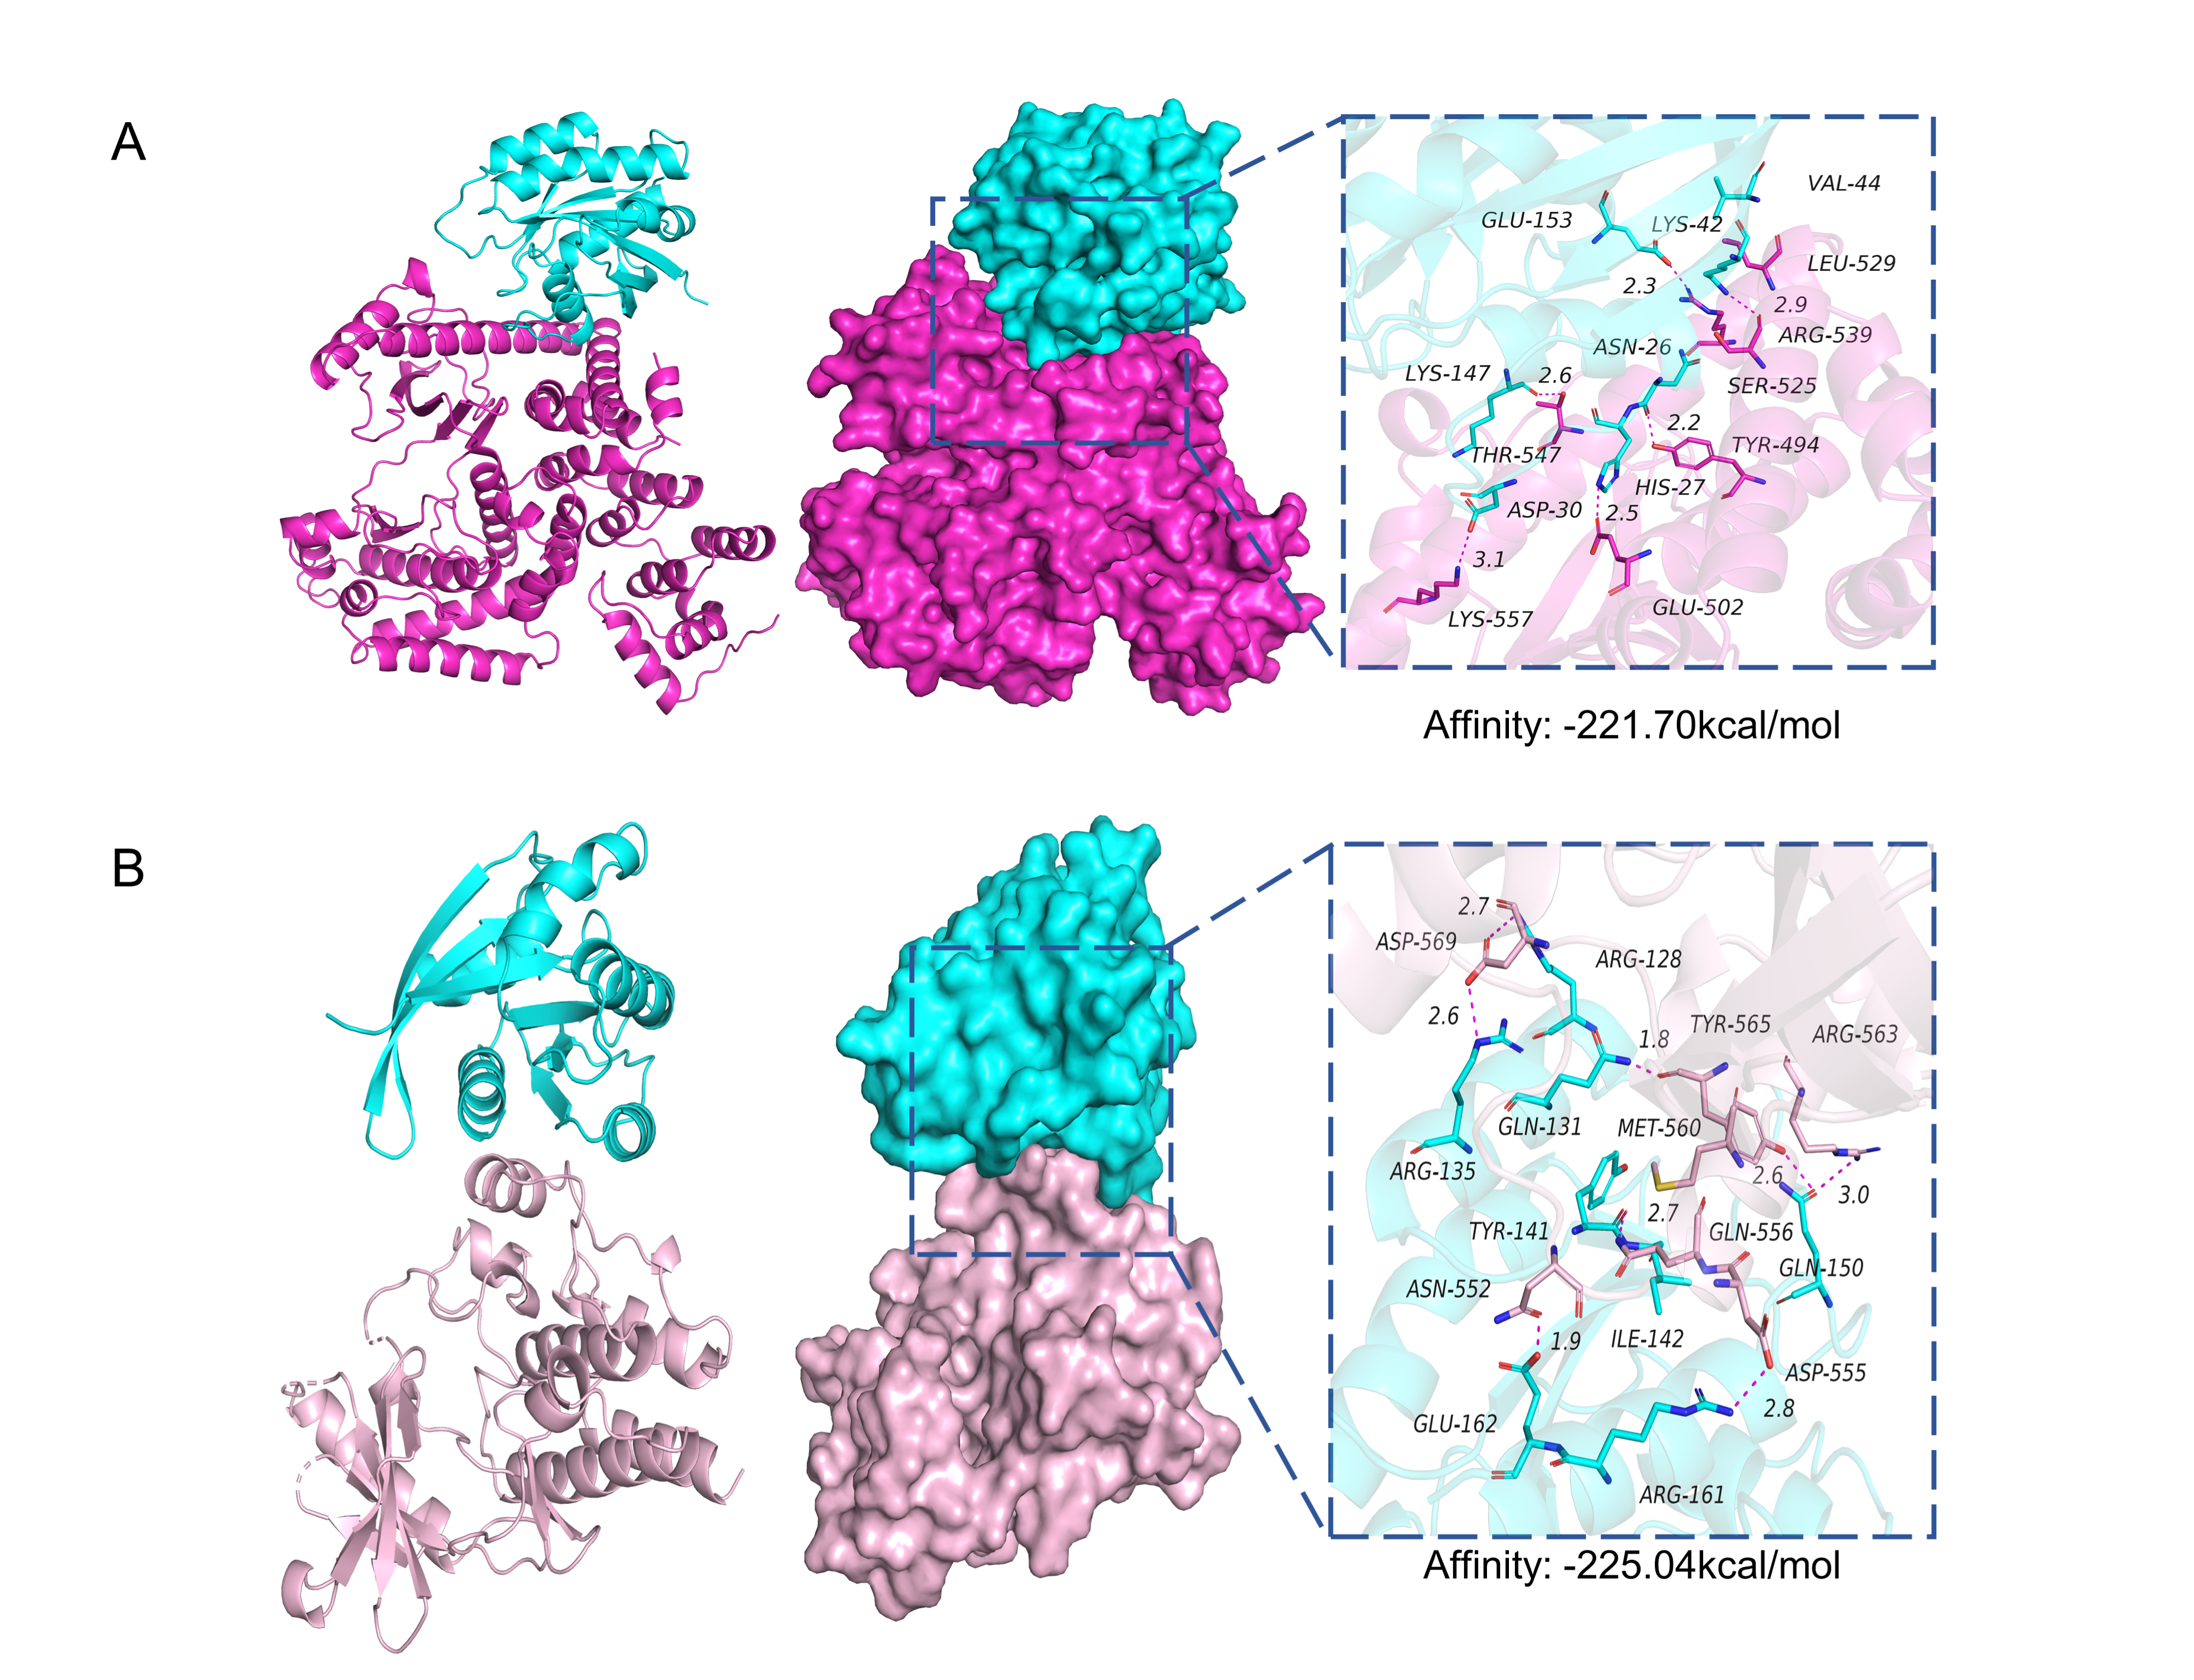


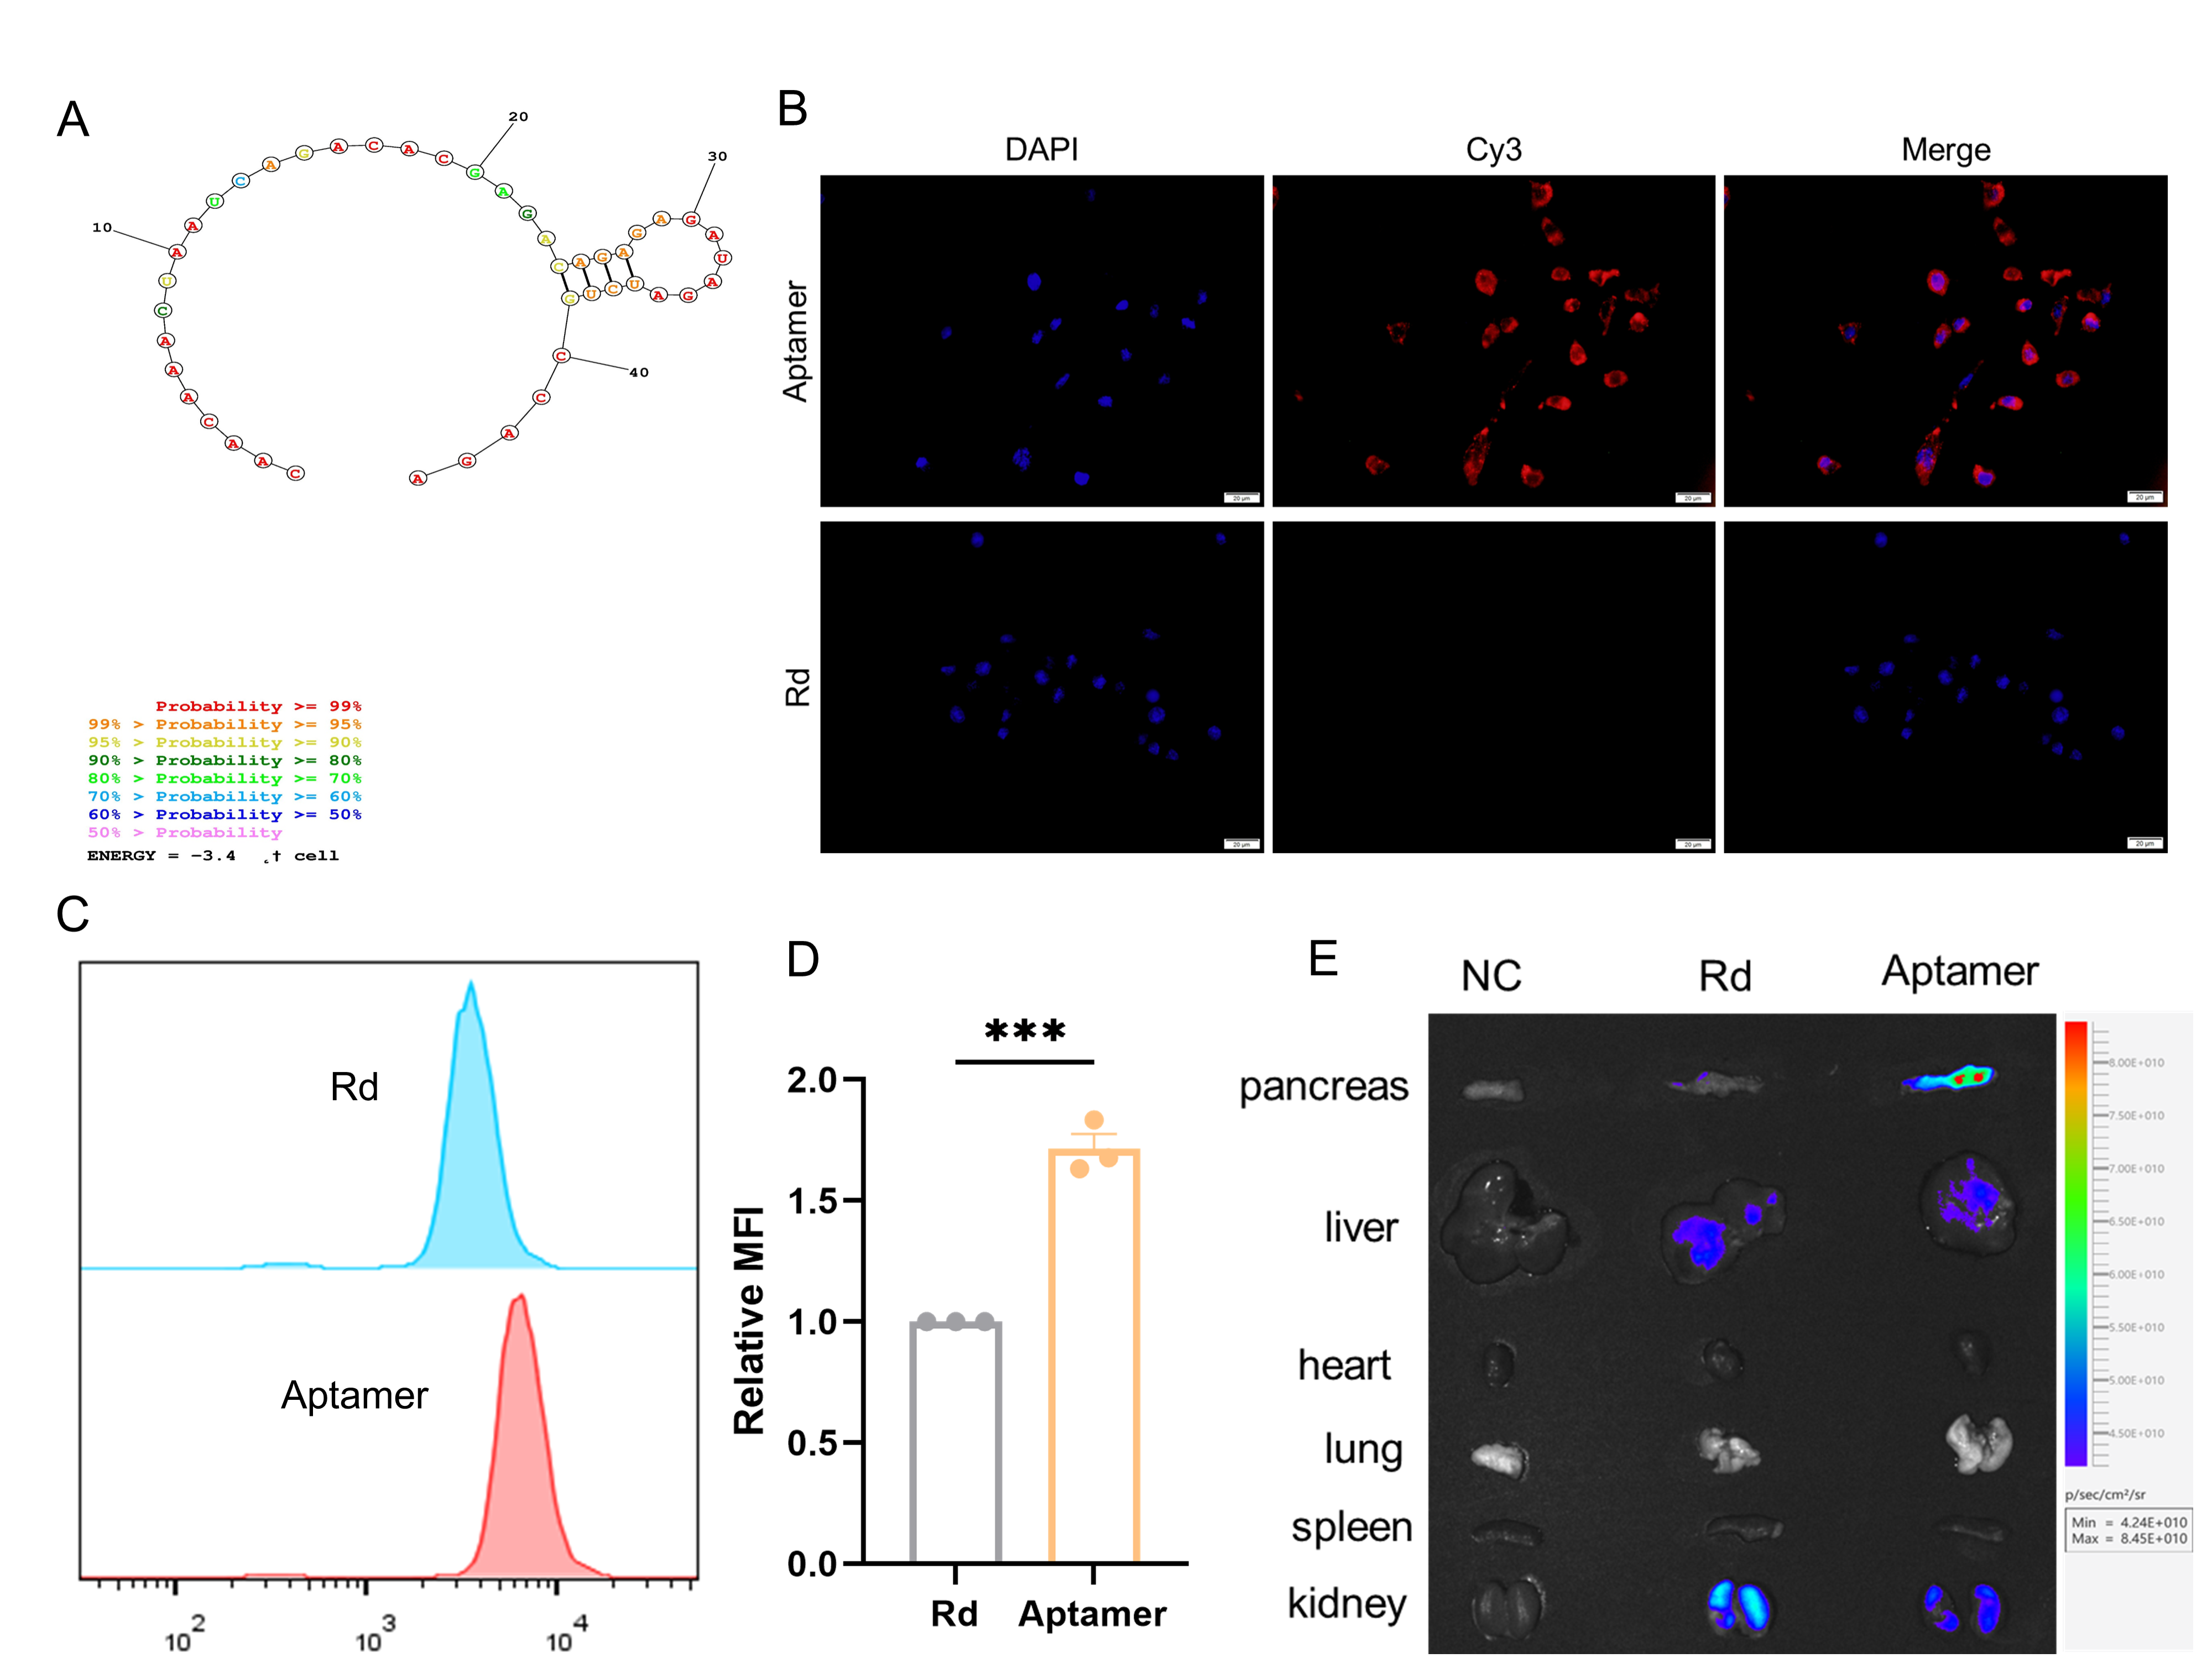


**Figure S4.** (A)The aptamer structure was predicted by the RNAStrcuture Website. (B)The affinity of Cy3-labeled aptamer and random sequences to MIN-6 cells was analyzed by immunofluorescence (scale bar, 20μm). (C) Flow cytometry analysis of the affinity of Cy3-labeled aptamer and random sequences for MIN-6 cells as well as quantification of fluorescence intensity(D). (E) Ex vivo imaging of organs 4 h after tail vein infusion of Cy3-labeled aptamers and random sequences.(***P < 0.001).

| Gene name | Species | 5’-3’ |
| --- | --- | --- |
| PTGS2 | F | GATGACGAGCGACTGTTCCA |
|  | R | TGGTAACCGCTCAGGTGTTG |
| ACSL4 | F | TGTGAGCGCATACCTGGATT |
| SLC7A11  HO-1  β-actin  GPX4  (ChIP-qPCR)  SLC7A11  (ChIP-qPCR)  NRF2-si-1  NRF2-si-2  NRF2-si-3  Aptamer | R  F  R  F  R  F  R  F  R  F  R  F  R  F  R  sence  antisence | CAGCCGTAGGTAAAGCAGGA  CATACTCCAGAACACGGGCA  TGCTCGTACCCAATTCAGCA  CTTCCCGAGCATCGACAACC  AATGTTGAGCAGGAAGGCGG  CTCTGTGTGGATTGGTGGCT  CGCAGCTCAGTAACAGTCCG  ATTAGATCCAGGGGAGGGCG  CTTGTGACCTTGTCTAGGCCC  TGAAAGCTGCGTATGAATAGGGT  AGGTCCATTTCCTAAAGCTGAGA  CCGAGUUACAGUGUCUUAATT  UUAAGACACUGUAACUCGGTT  CCCUGUUGAUGACUUCAAUTT  AUUGAAGUCAUCAACAGGGTT  GGAGAGGGAAGAAUAAAGUTT  ACUUUAUUCUUCCCUCUCCTT  CAACAAACUAAUCAGACACGAGACAGAGAGAUAGAUCUGCCAGA |

**Table S1.** Sequences used in RT-qPCR, ChIP-qPCR, cell transfection and aptamer.

| Antibody | Brand and Catalogue number | Application |
| --- | --- | --- |
| GAPDH | Proteintech, 60004-1-Ig | Western blotting |
| Calnexin | Proteintech, 10427-2-AP | Western blotting |
| CD9 | Proteintech, 60232-1-Ig | Western blotting |
| TSG101 | Proteintech, 28283-1-AP | Western blotting |
| HSP70 | Abcam, ab5439 | Western blotting |
| NRF2 | Affinity, AF0639 | Western blotting |
| p-NRF2 | Affinity, DF7519 | Western blotting, IF staining |
| KEAP1 | Abmart, TA5266 | Western blotting |
| GPX4 | Abcam, ab125066 | Western blotting, IHC staining |
| HO-1 | Abmart, T55113 | Western blotting |
| SLC7A11 | ABclonal, A2413 | Western blotting |
| integrin α5 (ITGA5) | ABclonal, A19069 | Western blotting |
| integrin β3 (ITGB3) | ABclonal, A19073 | Western blotting |
| HRAS | ABclonal, A7901 | Western blotting |
| Ras-associated protein 1A (RAP1A) | ABclonal, A0975 | Western blotting |
| Ras-associated protein 1B (RAP1B) | ABclonal, A12925 | Western blotting |
| AKT | CST, 4691 | Western blotting |
| p-AKT | CST, 4060 | Western blotting, IHC and IF staining |
| ERK | CST, 4695 | Western blotting |
| p-ERK | CST, 4370 | Western blotting, IHC and IF staining |
| NRF2 | CST,12721 | ChIP， Western blotting |
| ACSL4 | ABclonal, A20414 | IHC staining |
| Insulin | Abcam, ab181547 | IF staining |
| Glucagon | Proteintech, 67286-1-Ig | IF staining |

**Table S2.** Antibodies used in this paper
